# Supplementary material
Source: publisher figshare collection journal article supplement (https://gsapubs.figshare.com/ndownloader/files/22409502)
Supplement: Supplementary file 1 [file 22409502]

## Sheet: PaperBasedMeasurements
Salisbury, J.B., Haddad, D.E., Rockwell, R., Arrowsmith, JR., Madugo, C., Zielke, O., and Scharer, K., 2015, Validation of meter-scale surface faulting offset measurements from high-resolution topographic data: Geosphere, v. 11, doi:10.1130/GES01197.1.
				Site 1	Paper		obliquity	FZ width			Site 2	Paper		obliquity	FZ width			Site 3	Paper		obliquity	FZ width			Site 4	Paper		obliquity	FZ width			Site 5	Paper		obliquity	FZ width			Site 6SE	Paper		obliquity	FZ width			Site 6NW	Paper		obliquity
#	Class	Unique_ID	Experience	meas (m)	(+)	(-)	q1	q1	feature	comments	meas (m)	(+)	(-)	q1	q1	feature	comments	meas (m)	(+)	(-)	q1	q1	feature	comments	meas (m)	(+)	(-)	q1	q1	feature	comments	meas (m)	(+)	(-)	q1	q1	feature	comments	meas (m)	(+)	(-)	q1	q1	feature	comments	meas (m)	(+)	(-)	q1
	Rockwell geomorphology class, 2012 - each participant completed the paper survey twice
1	Geomorph	a	2	3	1	1	1	2			10	2	2	1	2			4	1	1	2	3			12	3	3	1	2			5	1	1	2	2										10	3	3	1
2	Geomorph	b	2	3	1	1	1	3			10	1	1	2	2			18														4	1	1	2	1										12	1	1	1
3	Geomorph	c	2	5	2.5	2.5	2	1			16	8	8	2	3			15	7.5	7.5	1	3			0.5	0.25	0.25	3	2			7	3.5	3.5	1	3			9	4.5	4.5	2	3
4	Geomorph	d	2	5	0.1	0.1	1	2										8	0.1	0.1	3	1			9	0.1	0.1	3	3			6	0.1	0.1	2	2
5	Geomorph	e	2	2	2	2	1	1			5	4	4	2	3			4	3	3	2	2			1	1	1	1	1			3	2	2	2	1			6	5	5	2	3
6	Geomorph	f	2	1.75	1	1	1	1			9.5	3.5	3.5	2	2			10	3.5	3.5	1	2			6.5	3	3	2	2			3.2	1.6	1.6	1	2			9	2	2	3	3
7	Geomorph	g	2	8			1	1			9			2	3																															30	5	5
8	Geomorph	h	1	2	1	1	3	2			11	2	2	3	2			16	5	5	2	2			2	1	1	1	3			4	2	2	2	2										13	5	5	2
9	Geomorph	1	2	2.5	2	2	1	1			10	4	4	2	2			8	5	5	3	3			2	3	3	1				3	2	2	2	2			6	4	4	1	1
10	Geomorph	2	2	3	1	1	1	2			12	4	4	2	2			6.5	2	2	1	3			3	5	5	1	3			9	4	4	3	2			6	3	3	1	2
11	Geomorph	3	2	3	1	1	1	1			12	2	2	1	2			20	3	3	1	3																								12	3	3	2
12	Geomorph	4	2	2.5	1.5	1.5	2	1			11	3	3	1	3			5	2.5	2.5	2	3			4	2	2	3	3			6	3	3	1	3			9	4	4	1	3
13	Geomorph	5	2	5	2	2	1	1			30	10	10	2	2			20	5	5	1	2			4	2	2	1	2			4	2	2	3	1										30	5	5	2
14	Geomorph	6	2	6	1.5	1.5	3	3			9	4	4	2	2			16	9	9	2	2			6	4	4	3	3			4	2	2	1	1										18	6	6	2
15	Geomorph	7	2	5	3	3	1	1			17	6	6	1	3			15	6	6	1	3			6	3	3	1	2			4	3	3	2	2			9	5	5	1	2
16	Geomorph	8	2	2.5	1	1	1	1			11	3	3	1	1			14	5	5	1	3			2	1	1	1	3			4	2	2	2	1										11	4	4	1
17	Geomorph	9	2	5	0.75	0.75	1	1			10	1.5	1.5	1	2			10	6	6	1	3			2	1	1	2	3			3.2	0.8	0.8	1	2			9	2	2	3	2
	Rockwell Neotectonics class, 2012 - ppr survey once, GE survey a week later
18	NeoTec	1	2	3	1	1	1	1			10	2	2	2	2			44	5	5	1	2			8	2	2	2	3			3	2	2	2	1										9	2	2	2
19	NeoTec	2a	4	1.6	0.5	0.5	1	1			11	0.5	0.5	1	3			10	1.5	1.5	1	2			1.1	0.5	0.5	1	3			3	1	1	1	3			5	1.5	1.5	2	2			2.5	0.75	0.75	2
20	NeoTec	2b	4	1.5	0.2	0.2	1	1										8.5	2	2	1	3
21	NeoTec	3	2	1	0.5	0.5	2	3			13	2	2	3	1			2	1	1	3	3			2	0.5	0.5	3	2			3	1	1	3	1
22	NeoTec	4	2	1.5	0.5	0.5					4.5	1	1					2.5	1.5	1.5					1.5	0.5	0.5					5.5	1	1					5	2	2					6.5	2	2
23	NeoTec	5	2	3	1	1	1	1			9	5	5	1	2			10	5	5	2	2			2	1	1	2	1			5	2	2	2	2										9	3	3	1
24	NeoTec	6	2	5	1	1	1	1			9	2	2	1	1			27	4	4	2	1										23	5	5	3	2										22	2	2	3
25	NeoTec	7	2	2.5	1	1	1	1			8	4	4	1	2			10	5	5	2	2			2	1	1	2	1			6	2	2	2	2			10	2	2	1	1
26	NeoTec	8	2	2.5	1	1	1	2			5	2.5	2.5	2	1			8	8	8	3	3			2.5	2	2	3	2			5	3	3	2	2			8	2.5	2.5	1	2
27	NeoTec	9	2	5.1	1	1	1	2			7	1	1	2	2			2	1	1	3	3			7	2	2	3	3			5	2	2	2	2			7	2	2	2	2
28	NeoTec	10	2	1.75	0.5	0.5	1	1			28	4	4	2	2			12	3	3	1	1			20	5	5	3	3			14.5	2	2	1	1			10.4	2	2	1	1			13	2	2	1
29	NeoTec	11	2	3	2	2	2	2			9	3	3	2	1			8	2	2	1	3			2	1	1	1	1			4	1	1	1	1										12	3	3	1
30	NeoTec	12	2	1.5	0.5	0.5	1	3			5.5	2	2	2	2			6	3	3	3	3			1	0.5	0.5	2	2	2		4	1	1	2	2			6	1	1
31	NeoTec	13	2	2.2	0.3	0.3	2	2			11							12	1	1	2	2			1	0.1	0.1	3	3			4	0.5	0.5					2	0.5	0.5	3	3			4	1	1	3
32	NeoTec	14	2	2	0.5	0.5	1	1			12	1	1					8	1	1	1	3										4	0.5	0.5	3	2			3	1	1	1	3
33	NeoTec	15	2	2.5	0.5	0.5	1	1			7	3	3	1	2			10	2	2	1	1										3	2	2	1	3										10	3	3	1
34	NeoTec	16	2	2.5	0.25	0.25	1	1			6.5	1.5	1.5	2	1			8	2	2	2	1										3.5	0.5	0.5	2	1										11	2	2	2
	Arrowsmith structure class, 2012, run by David Haddad (with help of Dom). these measurements were repeated with GE a week post paper exercise.
35	GLG310	-1	2	2.5	0.5	0.5	2	1			9	2	2	3	3			14	2	2	2	1									no fault	7	1	1	2	1			6	1	1	2	1
36	GLG310	-2	2	17	2	2	1	1			5.2	5	5	3	3		difficult to define fault and piercing points	22	3	3	2	2		can clearly see the fault, but the offset and obliquity is hard to define							difficult!															11	1	1	1
37	GLG310	-3	2	1.5	0.5	0.5	1	1			10	2.5	2.5	1	3			5	2.5	2.5	1	3			5	1	1	2	3			3	0.5	0.5	1	2			2	1	1	1	1
38	GLG310	-4	2	7	1.5	1.5	2	3			13	2	2	2	2			9	2	2	1	2			3	1	1	1	2		difficult to judge	5	1	1	2	3			4	2	2	2	2
39	GLG310	-6	2	4.9	1	1	1	1			5	2	2	3	3			16	3	3	1	1										8.9	1	1	2	3										6.5	1	1	3
40	GLG310	-7	2	2.5	0.2	0.2	2	2			7	1	1	3	2			16	1	1	3	1			1	0.1	0.1	3	2			4	0.5	0.5	3	1			10	0.5	0.5	3	1			14	0.5	0.5	1
41	GLG310	-9	2	2.3	0.1	0.1	1	2			9.4	0.1	0.1	1	3			11.1	0.07	0.07	1	2			1.1	0.1	0.1	2	3			3.8	0.2	0.2	1	3			10.1	0.1	0.1	2	2			8.9	0.1	0.1	2
42	GLG310	-10	2	1.75	0.25	0.25	1	1			15	3	3	1	2			10	2	2	1	1
43	GLG310	-12	2	2	0.5	0.5	2	1			9.5	2	2	1	3			11	2	2	1	2									not clear	5	1	1	1	3										7	3	3	2
44	GLG310	-14	2	2.5	0.5	0.5	2	2			11.5	1	1	1	3			9	1.5	1.5	1	3			3	0.5	0.5	1	3			6	1	1	2	2			10	1.5	1.5	2	2			10	1.5	1.5	2
45	GLG310	-15	2	1.5	0.2	0.2	2	2			5	1	1	3	3			7	1	1	2	2									I don't really see anything	11.2	5	5	1	1			8	2	2	2	2
46	GLG310	-16	2	3	1	1	1	3			10	2	2	1	3		I just guessed	13	2	2	1	1									I don't know	4	1	1	1	2										10	2	2	1
47	GLG310	-17	2	2	1	1	1	1			9.5	1.5	1.5	3	3			14	2	2	1	2			2	5	5	3	3		hard to visualize elements	6.8	1	1	2	2			6	1	1	2	1
48	GLG310	-18	2	5	1	1	1	1			18	3	3	2	2			5	1	1	2	3			20	10	3	3				70	10	10	3	2			7	2	2	1	3
49	GLG310	-19	2	1.8	1	1	1	1			13.25	2	2	1	3			11	7	7	1	3									there is no fault	6	0	0	2	1			5.7	2	2	2	2
50	GLG310	-21	1	3	0.5	0.5	1	1			13	0.7	0.7	1	1			5	1	1	3	3		it is hard to determine where the fault is	2	0.5	0.5	1	1			5	1	1	2	2			7	2	2	2	2
51	GLG310	-22	1	2	0.5	0.5	1	1			12	0.25	0.25	1	3			8	3	3	1	2			1	0.5	0.5	2	1		could not determine clear and obvious fault	3	0.5	0.5	1	3			10	3	3	3	2
52	GLG310	-23	2	2.2	1	1	2	3		using different piercing points produces little variation in my measurements - but the quality of the offset introduces unertainty	11.9	4	4	1	2		quality is higher - but measurements from different pierce lines vary considerably	20	10	10	1	3		measurements vary considerably, connection between pierce lines uncertain	5.5	2	2	1	3		low-resolution scale bar increases uncertainty	4	1	1	1	3			10	3	3	1	1
53	GLG310	-25	3	2.28	0.88	0.88	1	3			10.34	3.45	3.45	1	2			10.4	8	8	3	3			0.5	0.5	0.5	2	2			18.09	0.5	0.5	3	3			3.93	0.5	0.5	3	3
54	GLG310	-26	2	1.5	2.5	1	1	1			2	3	1.5	2	3		I can't tell where the offset is	3	4	2.5	2	2										1	2	0.5	1	2		no idea where to put offset
55	GLG310	-28	2	2.28			1	1			4.8			1	1									fault is difficult to define
56	GLG310	-29	1	4	1	1	3	3			12	5	5	1	1			15	10	3	2
57	GLG310	-30	2	4	5	4	2	3		fault location clear though not precise and offset very hard for me to locate. not a clear enough offset	4	6	0	1	3		not even sure that is a fault, would have preferred satelite image or more more zoomed out picture							the contour lines and shaded relief absurdly confusing, I don't know which direction is higher in elevation of the context of this image							shaded or not I need a reference elevation line and context can't continue. I don't even know with any certainty whats a fault in these images.
58	GLG310	-31	2	7.5	0.5	0.5	2	2			11	3	3	3	3			16	5	5	3	3			5	2	2	3	3			5	0.5	0.5	1	1			14	4	4	2	2
59	GLG310	-32	2	3	0.5	0.5	1	1		my obliquity rating is highly biased on my ability to recognize 2 offset features	11	1	1	2	3			14	0.5	0.5	1	3			5	2	2	2	3		I keep rating them pretty low because I'm not confident in the places of my point lines	4	0.5	0.5	1	2			6.5	1	1	3	2
60	GLG310	-34	2	5	0.5	0.5	1	1			14	1	1	2	2			16	1	1	2	3			10	1	1	3	2			5	1	1	1	2			20	1.5	1.5	3	3
61	GLG310	-35	2	2.5	0.05	0.05	3	1			6	0.1	0.1	2	2			9	0.001	0.001	2	1			6.5	0.2	0.2	1	3			5	0.1	0.1	3	3			15	0.05	0.05	3	2
62	GLG310	-36	2	2.8	0.5	0.5	2	2			11	1.5	1.5	2	3			5.6	2	2	2	3		hard to place top offset line	5.25	1.5	1.5	2	2			4.9	0.5	0.5	3	3										19.4	1.5	1.5	3
63	GLG310	-38	2	2.5	0.5	0.5	1	1			10.8	3	3	3	3			11	5	5	3	3			2	2	2	3	3			2	0.5	0.5	2	2			10	5	5	2	2
64	GLG310	-39	2	2.3	2	2	2	2			11	3	3	1	3		I don't know where the fault is	11	4	4	2	3
65	GLG310	-40	2	2.5			1	1									I can't identify an offset or fault	8	0.5	1	1	2			5	2.5	2.5	1	2			6.2	1	1	2	1										6	1	1	1
66	GLG310	-42	2	2	1	1	1	1			10	2	2	1	2			15	3	3	1	3										4	1	1	2	1			6	4	4	3	3
67	GLG310	-43	2	4			2	1			13			1	1																	5			2	1
	Rockwell geomorphology class, 2013 (GE responses a week post ppr exercise were lost to the faulty database) - first entry into any database
68	Geomorph	DA101	2	2.09	0.19	0.19	2	1			12.1	0.4	0.4	2	1			9.56	0.9	0.9	2	2			1.35	0.27	0.27	2	1			1.63	0.27	0.27	3	1			8.5	2	2	2	3			30.71	0.72	0.72	2
69	Geomorph	769	2	2	1.5	1.5	1	2			10	1.5	1.5	1	2			10.5	1.5	1.5	1	3			3.5	1.5	1.5	1	1			6	1.5	1.5	2	1			9	1.5	1.5	1	1
70	Geomorph	GAC5	1	2	0.5	0.5	1	1			11	2	2	1	3			11	1	1	1	3			13	10	10	1	3			4.5	2	2	2	1			7.5	2	2	3	3
71	Geomorph	RA26	1	1.6	0.3	0.3	2	1			12	4	4	1	1			16	2	2	2	2			3	1	1	1	3			3.7	0.7	0.7	2	1			3	1	1	2	2
72	Geomorph	AJ3	2	1.9	0.5	0.5	2	1			9.5	1.5	1.5	2	2			14	5	5	2	3			7	4	4	3	3			3	1	1	2	2			7	2	2	2	3
73	Geomorph	DWP13	2	3	0.5	0.5	2	2			8	1	1	2	2			9	1	1	2	2			1	0.5	0.5	2	2			3	0.5	0.5	2	2			7	2	2	2	2
74	Geomorph	1984	1	2.1	0.19	0.19	2	2			6.1	1.1	1.1	2	3			22.5	0.9	0.9	1	3			4.86	0.97	0.97	2	3			7.11	0.25	0.25	3	1			8.4	1.1	1.1	3	3
75	Geomorph	LCW46	2	3	0.1	0.1	1	1			11	2.5	2.5	1	2			10	0.5	0.5	1	2			3	0.5	0.5	1	1			5.25	0.5	0.5	2	3			7.5	1.5	1.5	2	2
76	Geomorph	1444	na	2.45	0.175	0.175	1	1			12	1	1	2	2			8	0.8	0.8	1	1			2	0.5	0.5	3	3			12.5	5	5	1	1			6.5	1.5	1.5	1	1
77	Geomorph	SM1564	2	2	0.2	0.2					12	0.5	0.5	2	3			11	1	1	3	1			3	0.5	0.5	1	3			5.5	0.5	0.5	2	3			7	1	1	2	2
78	Geomorph	KP16	2	2	1	1	2	2			9	1.5	1.5	2	2			12	1.5	1.5	1	1			2	1	1	3	3			5	1.5	1.5	2	3			7.5	1	1	1	2
79	Geomorph	KB123	2	2	0.4	0.4	2	1			10	1	1	1	3			20	3	3	2	1			6	3	3	1	2			3	0.4	0.4	3	1			10	2	2	3	1
80	Geomorph	KT10	1	2	0.5	0.5	2	1			13	3	3	1	3			12			2	1			7	2.5	2.5	3	2			5	1	1	3	1			7	1	1	2	2
81	Geomorph	PRJ13	1	1.5	0.5	0.5	2	1			11	3	3	1	3			11	7	7	2	2			2	2	2	1	3			5	1	2	2				7	3	3	2	2
82	Geomorph	HNW14	2	2.25	0.5	0.5	2	1			13.5	1.5	1.5	2	2			9.5	1.5	1.5	1	1			2.5	0.5	0.5	1	3			6	1	1	2	2			15	2	2	3	2			10	1.5	1.5	2
83	Geomorph	ACC07	2	2.8	0.5	0.5	2	3			4	0.5	0.5	1	2			8	1	1	3	1			5	2	2	2	1			5	2	2	3	2										14	1	1	3
84	Geomorph	SRP5	2	2.5	0.5	0.5	2	2			5.5	1	1	1	1			9	1	1	1	1			1	0.5	0.5	3	3			3.5	1	1	3	3			7	1	1	1	1
85	Geomorph	BR8	3	2	0.5	0.5	1	1			8	2	2	1	2			7	2	2	1	2			1	1	1	1	3			3	1	1	2	3			6	1.5	1.5	2	2
	Arrowsmith structure class, 2013, Dom administered - first entry into any database
86	GLG310	1a	2	2.5	1	1	3	3			10	2	2	2	2			5	1	1	3	3			3	2	2	3	3			2.5	1	1	3	3			4	2	2	3	3
87	GLG310	1b	2	4	0.6	0.6					8	1	1	2	2			10	3	3	1	1																	4	2	2	1	1
88	GLG310	2	2	2	1	1	2	2			10	5	5	1	1			8	1	1	1	1			11	2	2	2	2			5	2	2	2	2			10	2	2	2	2
89	GLG310	3	2	2.5			2	1			10			1	3			15			2	2			5			3	3										8			1	2
90	GLG310	6	2	5	2	2	2	2			12	3	3	2	2			18	3	3	1	1			5	2	2	3	3			5	2	2	2	2			8	2	2	1	1
91	GLG310	17	1	6	1	1	1	1			9	2.5	2.5	2	2			12	3	3	3	2			3	0.5	0.5	3	3			4	1	1	2	1										30	5	5	1
92	GLG310	19	2	2	0.5	0.5	1	1			10	2	2	1	2			20	5	5	2	2			2	0.5	0.5	1	1			4	0.5	0.5	1	2			10	1	1	2	2
93	GLG310	21	2	2.5	0.5	0.5	1	1			12	2	2	2	2			25	5	5	2	3			8	2	2	2	3			5.3	1	1	3	3			6.5	2	2	2	2
94	GLG310	22	1	2	1	1	3	3
95	GLG310	25	2	2	0.5	0.5	1	1			10	1	1	1	3			13	2	2	1	2			3.5	0.5	0.5	2	3			7	1	1	2	3										15	2	2	1
96	GLG310	27	2	3.9	1	1	1	3			11.5	0.2	0.2	2	2			20	0.3	0.3	3	1
97	GLG310	28	2	2.6	0.5	0.5	1	2			11	1	1	1	3			11	1	1	2	3			4	1	1	3	3			5	1	1	2	3			7	1	1	2	2
98	GLG310	31	1	2	1	1	1	3			5	2	2	1	2			15	5	5	1	3			4	1	1	1	3			7	7	7	3	3
99	GLG310	32	2	2	1	1	1	3			6	2	2	1	2			4	1.5	1.5	1	3			3	2	2	1	3			3	1	1	1	3
100	GLG310	33	1	4
101	GLG310	35	1	2.5	0.5	0.5	3	3										11	5	5	2	2			4	1	1	3	3			6.8	0.5	0.5	1	1										13	2	2	2
102	GLG310	36	2	3	0.5	0.5	1	2			19	2	2	3	3			14	3	3	3	2			4	2	2	3	3			4	1	1	1	1
103	GLG310	37	2								10	2	2	3	3			18	4	4	2	2
[truncated: 31 more columns]

## Sheet: GoogleEarthResponses
		Site 1				Site 2	large			Site 2	small			Site 3				Site 4				Site 5				Site 6	nw channel			Site 6	se channel			Site 7				Site 8				Site 9	large			Site 9	small
		meas (m)	q1	q2	feature	meas (m)	q1	q2	feature	meas (m)	q1	q2	feature	meas (m)	q1	q2	feature	meas (m)	q1	q2	feature	meas (m)	q1	q2	feature	meas (m)	q1	q2	feature	meas (m)	q1	q2	feature	meas (m)	q1	q2	feature	meas (m)	q1	q2	feature	meas (m)	q1	q2	feature	meas (m)	q1	q2	feature
ID	filenum
1	110332	2	1	1	thalweg	6.71	1	3	thalweg					8.59	1	2	thalweg					2.42	1	3	thalweg					5.21	2	2	se margin	5.1	1	3	se margin	10.6	1	3	crest	8.1	1	2	thalweg
		2.12	1	1	nw margin
2	134004	3.54	1	1	bar/thalweg	6.41	1	1	thalweg	2.54	2	1	thalweg	5.95	1	1	thalweg	20.95	2	3	???	0.97	1	3	thalweg					2.54	2	2	thalweg													3.22	1	1	thalweg
						5.99	1	1	nw margin																																					3.53	1	1	thalweg
3	164685	2.14	1	1	thalweg	8.8	1	3	thalweg	4.99	1	3	thalweg	5.59	1	3	main thalweg					2.82	3	2	thalweg					1.63	1	2	thalweg	3.49	2	3	thalweg					5.65	1	2	thalweg
														5.42	2	3	ridge to se
														6.46	2	3	thalweg to se
4	300245	1.89	1	1	nw margin	11.3	2	2	nw margin	1.64	1	1	thalweg	11.4	2	2	thalweg	0.76	3	3	thalweg	3.77	2	2	thalweg	1.1	2	2	thalweg	2.25	1	1	thalweg	5.43	1	2	se margin	17.3	2	2	crest	7.7	1	1	thalweg
5	871000	1.69	1	1	thalweg	10.7	1	2	thalweg	2.67	3	2	thalweg	7.81	1	1	thalweg	0.92	1	3	thalweg	3.46	1	3	thalweg	5.95	2	3	thalweg	4.4	2	2	thalweg	5.3	1	2	se margin	21.7	1	2	crest	10	1	1	thalweg	5.51	2	1	thalweg
		2.38	1	1	nw margin									8.63	2	1	thalweg to se									9.68	2	2	thalweg
6	115973	2.25			thalweg	7.81			thalweg					11.2			thalweg
7	130541	1.67	1	1	thalweg	7.9			nw margin													2.47			thalweg					3.3	1	2	thalweg									6.44	1	2	nw margin	4.45	1	2	se margin
		1.74	1	1	nw margin	8.57			se margin
8	141279	2.47	1	1	thalweg	4.3	2	2	thalweg					6.75	2	1	thalweg
		2.14	1	1	nw margin
		2.48	1	1	thal to nw
9	302918	1.98	1	1	thalweg	7.12	2	2	thalweg					1.7	1	2	thalweg	0.18	1	3	thalweg	2.7	2	3	thalweg					0.73	1	2	thalweg	8.17	3	3	se margin	12.5	2	3	crest	8.5	1	3	thalweg	1.5	3	2	thalweg
		1.62	1	1	nw margin
10	413649	2.82	1	1	thalweg	10.2	1	2	thalweg					9.44	1	2	thalweg	3.86	2	3	thalweg	3.37	2	3	thalweg					7.31	1	3	thalweg	1.92	2	3	thalweg	6.88	3	3	crest	7.14	2	2	thalweg
		2.44	1	1	nw margin
11	862984	1.91	1	1	thalweg	10.4	1	1	thalweg					13	1	1	thalweg					2.31	1	2	thalweg	6.31	3	3	thalweg	2.94	1	2	thalweg					4.6	1	3	crest	8.5	1	1	thalweg
12	973221	2.25	1	1	thalweg	9.31	2	3	thalweg					9.54	1	2	thalweg	1.45	1	1	thalweg	1.84	1	3	thalweg
13	117390																																													3.98
14	123128
15	135633	2.58	1	1	thalweg	10.8	1	3	thalweg					11.4	1	2	thalweg	4	2	3	thalweg	2.41	1	2	thalweg	5.21	1	2	thalweg	5.15	1	2	thalweg	8	3	3	thalweg	8.22	1	3	crest	7.27	1	1	thalweg
16	147509	2.68			nw margin	11.8	2	3	thalweg					2.51	2	2	thalweg	3.52	2	2	thalweg	5.68	3	2	???									5.29	2	2	se margin	2.34	2	2	crest
17	169808	0.73	1	3	thalweg	7.71	1	3	thalweg					11.2	2	3	thalweg	0.32	3	3	thalweg	2.51	2	3	thalweg	7	2	3	thalweg	6.1	2	3	thalweg	8.91	2	3	thalweg	7.8	2	3	crest	8	1	2	thalweg
		1.2	1	3	nw margin
18	173891		displacements not measured along strike of fault - systematic error
19	173942	2.79	1	1	thalweg	10.9	2	1	thalweg					4.86	1	1	thalweg	0.74	1	3	thalweg	3.33	2	3	thalweg					3.9	1	1	thalweg	3.59	2	3	thalweg	18.6	1	3	crest					2.91	1	1	thalweg
20	188748	2.3	1	1	thalweg	6.23	1	3	thalweg					5.62	1	3	thalweg					3.1	1	3	thalweg	5.1	1	3	thalweg	3.46	1	3	thalweg					14.6			crest	7.69	1	2	thalweg
21	207674	1.25	2	1	nw margin	7.77	1	2	thalweg					6.89	1	2	thalweg	4.36	2	2	thalweg/margin	2.45	2	3	tthalweg													9.17	2	3	crest	7.4	2	1	thalweg
22	430365					9.83			thalweg					11.2			thalweg					3.56			thalweg					6			thalweg					16.6			crest					4.81			thalweg
23	472408	2.65	1	1	thalweg	9.24	1	2	thalweg					16.4	1	3	thalweg									16.89	2	3	thalweg													10.2			thalweg
24	516447	3.39	2	1	se margin	8.78	1	3	thalweg					2.55	3	1	thalweg	1.22	3	3	nw margin	2.51	1	3	thalweg	4.94	1	3	thalweg									6.47	3	2	crest	8.27	3	1	nw margin
25	555506	1.96	1	2	thalweg	6.1	3	3	thalweg					9.7	1	2	thalweg	4.42	1	3	thalweg	1.53	1	3	thalweg	5.5	1	3	thalweg	5.47	1	3	thalweg									8.61	1	2	thalweg
26	571198	4.01	2	1	se margin	7.37	2	3	thalweg									2.83	1	2	thalweg	3.86	2	3	thalweg	22.69	2	3	thalweg					15.33	2	3	margin/thalweg	5.47	2	3	crest					4.56	2	3	se margin
27	788084
28	795282	4.52	3	2	se margin	7.73	2	1	thalweg					2.21	1	3	thalweg	6.32	1	2	thalweg/margin	2.45	2	1	thalweg	35.2	3	3	thalweg					4.37	3	1	thalweg	25.8	1	3	crest					3.82	3	2	thalweg
[truncated: 25 more columns]
